# Supplementary material for: Long-Term SARS-CoV-2 Infection Associated with Viral Dissemination in Different Body Fluids Including Bile in Two Patients with Acute Cholecystitis
Source: MDPI journal article supplement (doi:10.3390/life10110302), 2020-11-23
Supplement: s1 [file s1]

Supplementary Materials

# Long-Term SARS-CoV-2 Infection Associated with Viral Dissemination in Different Body Fluids Including Bile in Two Patients with Acute Cholecystitis

**Table S1.** Hematological parameters and inflammatory markers for patient 1.

| Date of sample withdrawal                    | May 12th | May 13th | May 19th | May 26th | June 10th | July 2nd |
|----------------------------------------------|----------|----------|----------|----------|-----------|----------|
| White blood cells (cells/ $\mu$ L)           | 6.930    | 6.340    | 6.280    | 6.760    | 6.180     | 6.370    |
| Neutrophils (cells/ $\mu$ L)                 | 5.130    | 4.320    | 4.250    | 3.410    | 4.380     | 4.560    |
| Lymphocyte (cells/ $\mu$ L)                  | 1.290    | 1.370    | 1.460    | 2.480    | 1.480     | 1.350    |
| N/L ratio                                    | 3.98     | 3.15     | 2.91     | 1.38     | 2.96      | 3.38     |
| CRP (mg/L)<br>(normal range: 0–5)            | 55.8     | 16.3     | 11.9     | 35.7     | 2.8       | 26.7     |
| IL-6 (pg/L)<br>(normal range: <50)           | 53.0     | n.a.     | 4.61     | 21.8     | 5.6       | 13.4     |
| TNF-alpha (pg/L)<br>(normal range: 4.6–12.4) | 9.80     | n.a.     | 9.51     | 28.28    | 8.13      | 16.59    |
| D-dimers (ng/L)<br>(normal range: 0–500)     | 3617     | n.a.     | 1318     | 979      | 3657      | n.a.     |

N/L ratio: Neutrophils to Lymphocyte ratio; CRP: C-Reactive protein; IL-6: interleukin 6; TNF-alpha: Tumor necrosis factor-alpha; n.a.: not available.

**Table S2.** Hematological parameters and inflammatory markers for patient 2.

| Date of sample withdrawal                    | May 28th | June 4th | June 10th |
|----------------------------------------------|----------|----------|-----------|
| White blood cells (cells/ $\mu$ L)           | 11.380   | 3.080    | 10.160    |
| Neutrophils (cells/ $\mu$ L)                 | 4.250    | 2.160    | 2.210     |
| Lymphocyte (cells/ $\mu$ L)                  | 5.970    | 5.730    | 6.710     |
| N/L ratio                                    | 0.71     | 0.38     | 0.33      |
| CRP (mg/L)<br>(normal range: 0–5)            | 7.3      | 5.9      | 3.2       |
| IL-6 (pg/L)<br>(normal range: <50)           | 25.3     | n.a.     | 11.6      |
| TNF-alpha (pg/L)<br>(normal range: 4.6–12.4) | 58.86    | n.a.     | 35.3      |
| D-dimers (ng/L)<br>(normal range: 0–500)     | 655      | 809      | 917       |

N/L ratio: Neutrophils to Lymphocyte ratio; CRP: C-Reactive protein; IL-6: interleukin 6; TNF-alpha: Tumor necrosis factor-alpha; n.a.: not available.

**Publisher's Note:** MDPI stays neutral with regard to jurisdictional claims in published maps and institutional affiliations.

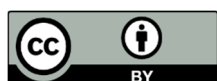

© 2020 by the authors. Submitted for possible open access publication under the terms and conditions of the Creative Commons Attribution (CC BY) license (<http://creativecommons.org/licenses/by/4.0/>).
